# Supplementary material for: In-silico and in-vitro studies on the efficacy of mangiferin against colorectal cancer
Source: PubMed Central journal article supplement (PMC9172119; doi:10.1186/s13065-022-00835-9), 2022-06-07
Supplement: 13065_2022_835_MOESM1_ESM.pdf [file 13065_2022_835_MOESM1_ESM.pdf]

| Sl No. | Protein Receptors                                    | PDB ID | Grid Size |    |    | Grid Center |         |         |
|--------|------------------------------------------------------|--------|-----------|----|----|-------------|---------|---------|
|        |                                                      |        | X         | Y  | Z  | X           | Y       | Z       |
| 1      | APC                                                  | 3NMZ   | 74        | 80 | 76 | 39.464      | -35.473 | -15.899 |
| 2      | BUBR1                                                | 3SI5   | 54        | 34 | 50 | 18.288      | -1.496  | 30.564  |
| 3      | CDK8                                                 | 3RGF   | 78        | 60 | 74 | 0.004       | 4.816   | 14.09   |
| 4      | CK2 $\alpha$                                         | 3WAR   | 64        | 62 | 58 | -6.857      | -10.782 | 17.708  |
| 5      | FABP6                                                | 5L8I   | 48        | 40 | 44 | 50.711      | -7.935  | 59.08   |
| 6      | K-Ras                                                | 4OBE   | 46        | 40 | 40 | -5.975      | -22.372 | 42.093  |
| 7      | SPINDLE ASSEMBLY<br>CHECKPOINT PROTEIN<br>HUMAN MAD2 | 1DUJ   | 62        | 48 | 48 | -14.163     | 27.893  | -2.86   |
| 9      | Bcl-xL                                               | 1MAZ   | 48        | 42 | 46 | 1.936       | 22.227  | 39.275  |
| 10     | Bcl-2                                                | 2XA0   | 40        | 44 | 36 | 33.475      | -16.507 | -15     |
| 12     | COX-2                                                | 3NT1   | 50        | 52 | 40 | -33.808     | -45.335 | -24.417 |
| 14     | CYTOCHROME P450                                      | 4NZ2   | 70        | 70 | 54 | -39.032     | -61.36  | -25.174 |
| 15     | PRTOEIN KINASE B                                     | 1UNR   | 64        | 62 | 88 | 12.956      | -0.73   | -1.799  |
| 16     | TNF $\alpha$                                         | 4TWT   | 62        | 74 | 66 | 5.591       | 95.39   | 234.344 |
| 17     | LEUKOTRIENE A4<br>HYDROLASE                          | 1HS6   | 76        | 74 | 62 | 16.502      | 40.003  | 64.68   |
| 18     | NF- $\kappa$ B                                       | 1VKX   | 74        | 84 | 90 | 0.144       | 37.93   | 57.762  |

Table S1. Grid Map of Target Proteins.

| <b>Sl No.</b> | <b>Protein Receptors</b>                          | <b>Area</b> | <b>Volume</b> |
|---------------|---------------------------------------------------|-------------|---------------|
| 1             | APC                                               | 30554.495   | 19137.348     |
| 2             | BUBR1                                             | 929.352     | 4503.129      |
| 3             | CDK8                                              | 505.676     | 453.661       |
| 4             | CK2 $\alpha$                                      | 22373.545   | 13180.014     |
| 5             | FABP6                                             | 6460.869    | 4383.774      |
| 6             | K-Ras                                             | 9880.206    | 5579.96       |
| 7             | SPINDLE ASSEMBLY CHECKPOINT<br>PROTEIN HUMAN MAD2 | 650.976     | 407.29        |
| 9             | Bcl-xL                                            | 8154.042    | 3980.534      |
| 10            | Bcl-2                                             | 9510.191    | 5132.427      |
| 12            | COX-2                                             | 2009.530    | 1567.961      |
| 14            | CYTOCHROME P450                                   | 32433.279   | 21039.17      |
| 15            | PRTOEIN KINASE B                                  | 5370.878    | 2791.758      |
| 16            | TNF $\alpha$                                      | 15321.63    | 9131.527      |
| 17            | LEUKOTRIENE A4 HYDROLASE                          | 1489.538    | 1170.915      |
| 18            | NF- $\kappa$ B                                    | 31569.852   | 21777.641     |

Table S2. Area and volume predicted by CASTp for each protein(as active sites).

| Model No | Regression Equation                                                                                                                                                                                                                                                                                           |
|----------|---------------------------------------------------------------------------------------------------------------------------------------------------------------------------------------------------------------------------------------------------------------------------------------------------------------|
| 1        | $pIC_{50} = - 3.7345 (\pm 2.5333) MATS7m - 1.2090 (\pm 1.6292) IC5 + 10.3389 (\pm 8.1164)$<br>(n = 11; R = 0.890; s = 0.187; F = 15.322; R <sup>2</sup> = 0.7930, R <sup>2</sup> -Adj.= 0.7412; p = 0.0018; Q <sup>2</sup> = 0.563;<br>S <sub>Press</sub> = 0.272 ; S <sub>DEP</sub> = 0.243)                 |
| 2        | <b><math>pIC_{50} = + 7.4923 (\pm 5.3523) MATS1e - 2.5401 (\pm 2.2482) MATS7e + 5.1776 (\pm 0.5934)</math></b><br>(n = 11; R = 0.907; s = 0.173; F = 18.502; R <sup>2</sup> = 0.8222; R <sup>2</sup> -Adj.= 0.7778; p = 0.0010; Q <sup>2</sup> = 0.615; S <sub>Press</sub> = 0.255; S <sub>DEP</sub> = 0.228) |
| 3        | $pIC_{50} = + 7.7926 (\pm 5.2314) MATS1e - 2.4613 (\pm 2.1907) MATS7v + 5.2097 (\pm 0.5738)$<br>(n = 11; R = 0.906; s = 0.174; F = 18.386; R <sup>2</sup> = 0.8213; R <sup>2</sup> -Adj. = 0.7766; p = 0.0010; Q <sup>2</sup> = 0.587 ;<br>S <sub>Press</sub> = 0.264 ; S <sub>DEP</sub> = 0.236)             |
| 4        | $pIC_{50} = + 8.0187 (\pm 6.4297) MATS1e - 0.7222 (\pm 0.9798) H6u + 6.4023 (\pm 1.0392)$<br>(n = 11; R = 0.871; s = 0.202; F = 12.569; R <sup>2</sup> = 0.7586; R <sup>2</sup> -Adj.= 0.6982; p = 0.0034; Q <sup>2</sup> = 0.644;<br>S <sub>Press</sub> = 0.245; S <sub>DEP</sub> = 0.220)                   |
| 5        | $pIC_{50} = + 1.7703 (\pm 2.2997) GATS7v + 0.0957 (\pm 0.1267) DISPv + 2.2872 (\pm 2.1511)$<br>(n = 11; R = 0.811; s = 0.241; F = 7.672; R <sup>2</sup> = 0.6573; R <sup>2</sup> -Adj.= 0.5716; p = 0.0138; Q <sup>2</sup> = 0.374;<br>S <sub>Press</sub> = 0.325 ; S <sub>DEP</sub> = 0.291)                 |
| 6        | $pIC_{50} = - 2.9042 (\pm 2.9745) MATS7e + 0.0892 (\pm 0.1150) DISPv + 3.9688 (\pm 0.6540)$<br>(n = 11;R = 0.841; s = 0.222; F = 9.680; R <sup>2</sup> = 0.7076; R <sup>2</sup> -Adj.= 0.6345; p = 0.0073; Q <sup>2</sup> = 0.495;<br>S <sub>Press</sub> = 0.292; S <sub>DEP</sub> = 0.261)                   |
| 7        | $pIC_{50} = - 2.9872 (\pm 3.1624) MATS7e - 1.3748 (\pm 2.0869) IC5 + 11.2582 (\pm 10.3893)$<br>(n = 11; R = 0.826; s = 0.232; F = 8.592; R <sup>2</sup> = 0.6823;R <sup>2</sup> -Adj.= 0.6029;p = 0.0102; Q <sup>2</sup> = 0.496;<br>S <sub>Press</sub> = 0.292; S <sub>DEP</sub> = 0.261)                    |
| 8        | $pIC_{50} = - 2.7542 (\pm 2.9422) MATS7v + 0.0954 (\pm 0.1141) DISPv + 3.9442 (\pm 0.6607)$<br>(n = 11; R = 0.836; s = 0.226; F = 9.251; R <sup>2</sup> = 0.6981; R <sup>2</sup> -Adj.= 0.6227; p = 0.0083; Q <sup>2</sup> = 0.433;<br>S <sub>Press</sub> = 0.310; S <sub>DEP</sub> = 0.277)                  |

Table S3. 2D-QSAR models for Xanthone derivatives.

|                         | <b>pI<br/>C<sub>50</sub></b> | <b>MAT<br/>S7m</b> | <b>MA<br/>TS1e</b> | <b>GAT<br/>S7m</b> | <b>GAT<br/>S7v</b> | <b>GAT<br/>S7e</b> | <b>GAT<br/>S1e</b> | <b>MA<br/>TS7e</b> | <b>MA<br/>TS7v</b> | <b>DIS<br/>Pp</b> | <b>DI<br/>SP<br/>v</b> | <b>H6<br/>u</b> | <b>HAT<br/>S7p</b> | <b>IC<br/>5</b> |
|-------------------------|------------------------------|--------------------|--------------------|--------------------|--------------------|--------------------|--------------------|--------------------|--------------------|-------------------|------------------------|-----------------|--------------------|-----------------|
| <b>pIC<sub>50</sub></b> | 1.000                        | 0.847              | 0.819              | 0.847              | 0.726              | 0.744              | 0.831              | 0.769              | 0.747              | 0.749             | 0.723                  | 0.713           | 0.707              | 0.703           |
| <b>MAT<br/>S7m</b>      | 0.847                        | 1.000              | 0.733              | 0.926              | 0.779              | 0.830              | 0.805              | 0.927              | 0.881              | 0.679             | 0.701                  | 0.752           | 0.754              | 0.561           |
| <b>MAT<br/>S1e</b>      | 0.819                        | 0.733              | 1.000              | 0.878              | 0.610              | 0.632              | 0.889              | 0.539              | 0.503              | 0.638             | 0.740                  | 0.576           | 0.612              | 0.620           |
| <b>GAT<br/>S7m</b>      | 0.847                        | 0.926              | 0.878              | 1.000              | 0.862              | 0.893              | 0.862              | 0.847              | 0.822              | 0.758             | 0.785                  | 0.820           | 0.803              | 0.653           |
| <b>GAT<br/>S7v</b>      | 0.726                        | 0.779              | 0.610              | 0.862              | 1.000              | 0.995              | 0.864              | 0.899              | 0.930              | 0.724             | 0.597                  | 0.964           | 0.885              | 0.715           |
| <b>GAT<br/>S7e</b>      | 0.744                        | 0.830              | 0.632              | 0.893              | 0.995              | 1.000              | 0.872              | 0.928              | 0.947              | 0.733             | 0.626                  | 0.958           | 0.882              | 0.692           |
| <b>GAT<br/>S1e</b>      | 0.831                        | 0.805              | 0.889              | 0.937              | 0.864              | 0.872              | 1.000              | 0.762              | 0.759              | 0.682             | 0.707                  | 0.839           | 0.865              | 0.739           |
| <b>MAT<br/>S7e</b>      | 0.769                        | 0.927              | 0.539              | 0.847              | 0.899              | 0.928              | 0.762              | 1.000              | 0.992              | 0.665             | 0.577                  | 0.876           | 0.827              | 0.599           |
| <b>MAT<br/>S7v</b>      | 0.747                        | 0.881              | 0.503              | 0.822              | 0.930              | 0.947              | 0.759              | 0.992              | 1.000              | 0.672             | 0.548                  | 0.905           | 0.852              | 0.637           |
| <b>DIS<br/>Pp</b>       | 0.749                        | 0.679              | 0.638              | 0.758              | 0.724              | 0.733              | 0.682              | 0.665              | 0.672              | 1.000             | 0.921                  | 0.757           | 0.742              | 0.840           |
| <b>DIS<br/>v</b>        | 0.723                        | 0.701              | 0.740              | 0.785              | 0.597              | 0.626              | 0.707              | 0.577              | 0.548              | 0.921             | 1.000                  | 0.645           | 0.692              | 0.735           |
| <b>H6u</b>              | 0.713                        | 0.752              | 0.576              | 0.820              | 0.964              | 0.958              | 0.839              | 0.876              | 0.905              | 0.757             | 0.645                  | 1.000           | 0.921              | 0.784           |
| <b>HAT<br/>S7p</b>      | 0.707                        | 0.754              | 0.612              | 0.803              | 0.885              | 0.882              | 0.865              | 0.827              | 0.852              | 0.742             | 0.692                  | 0.921           | 1.000              | 0.868           |
| <b>IC5</b>              | 0.703                        | 0.561              | 0.620              | 0.653              | 0.715              | 0.692              | 0.739              | 0.599              | 0.637              | 0.840             | 0.735                  | 0.784           | 0.868              | 1.000           |

Table S4. Pearson correlation matrix of selected descriptors along with pIC<sub>50</sub> value.

| <b>Toxicity Rating</b> | <b>Commonly Used Term</b> | <b>(single dose to rats) mg/kg</b> |
|------------------------|---------------------------|------------------------------------|
| 1                      | Extremely Toxic           | 1 or less                          |
| 2                      | Highly Toxic              | 1-50                               |
| 3                      | Moderately Toxic          | 50-500                             |
| 4                      | Slightly Toxic            | 500-5000                           |
| 5                      | Practically Non-toxic     | 5000-15,000                        |
| 6                      | Relatively Harmless       | 15,000 or more                     |

Table S5. Toxicity Classes.
